# Supplementary material for: Non-emissive colour filters for fluorescence detection
Source: Royal Society of Chemistry journal article supplement (doi:10.1039/c0lc00642d), 2011-01-01
Supplement: c0lc00642d.pdf [file c0lc00642d.pdf]

## Non-emissive colour filters for fluorescence detection

Electronic Supplementary Information

Mikihide Yamazaki,<sup>a</sup> Oliver Hofmann,<sup>b</sup> Gihan Ryu,<sup>b</sup> Li Xiaoe,<sup>a</sup> Tai Kyu Lee,<sup>c</sup> Andrew J. deMello<sup>a,b</sup>  
and John C. deMello<sup>\*a,b</sup>

<sup>a</sup> Department of Chemistry, Imperial College London, South Kensington, London, UK SW7 2AZ.

<sup>b</sup> Molecular Vision Ltd, 90 Fetter Lane, London, UK, EC4A 1JP

<sup>c</sup> Nano-Pac Co. Ltd, Yeongtong-dong, Yeongtong-gu, Suwon-si, Gyeonggi-do, Korea

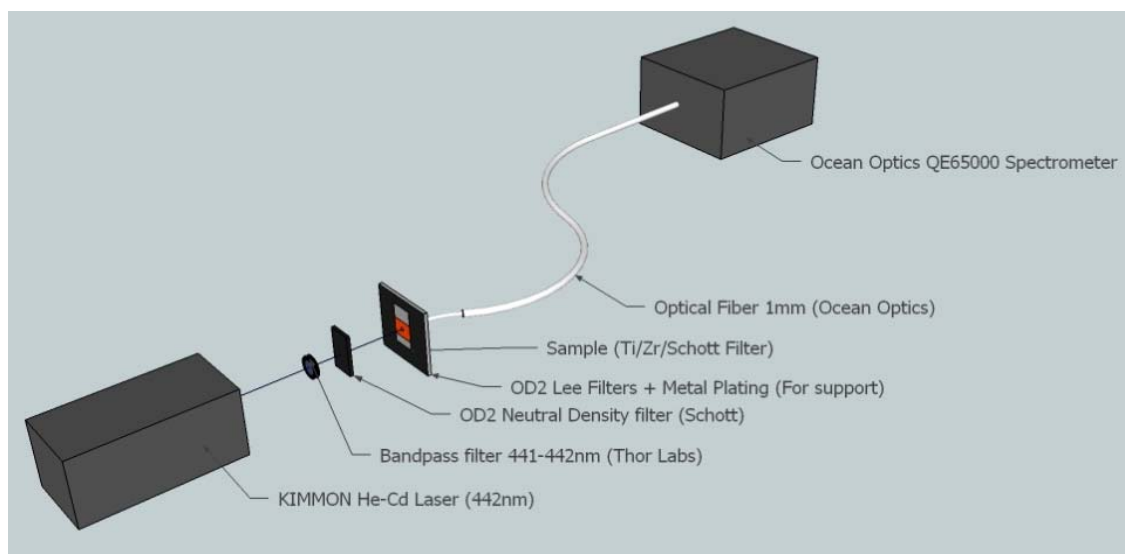

**ESI Fig. 1** – Schematic of configuration used for autofluorescence measurements. A 1.1 mW laser beam from a 442 nm HeCd laser is directed onto the front side of the filter and a fibre-optic coupled to a CCD spectrometer is placed against the rear-side of the filter immediately behind the laser spot, leading to collection of directly transmitted laser light and filter autofluorescence.

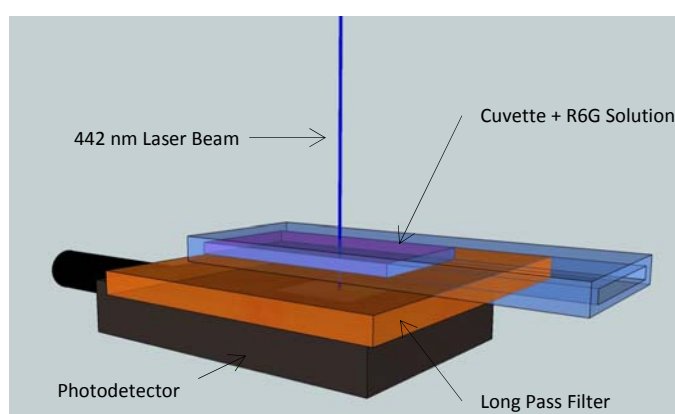

**ESI Fig. 2** – Schematic of configuration used for concentration measurements. The 1.1 mW laser spot from a 440 nm HeCd laser and a silicon photodiode are positioned opposite one another on the front and back surfaces of a cuvette, with the long-pass filter tightly inserted between the rear of the cuvette and the photodiode, leading to collection of transmitted laser light, analyte fluorescence and filter autofluorescence.

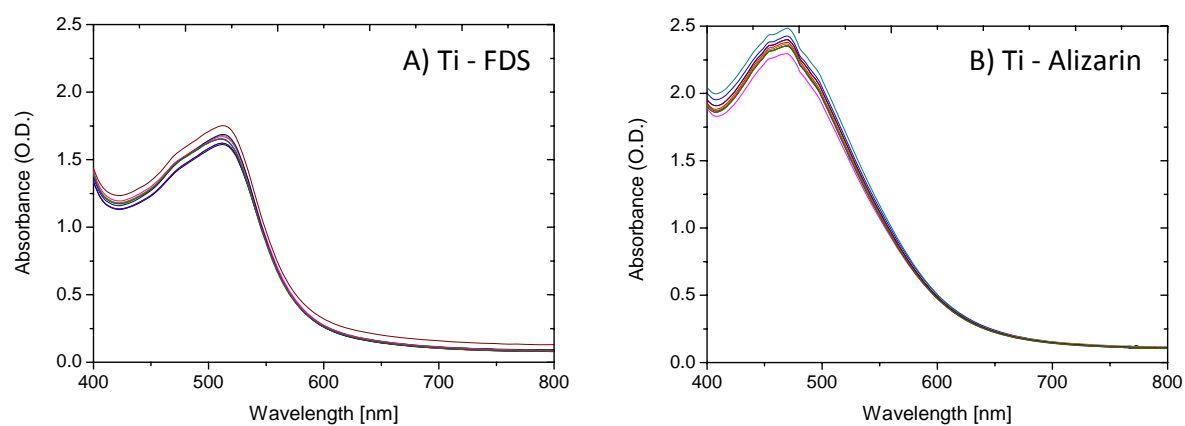

**ESI Fig. 3** Absorption spectra of 15 mm by 55 mm titania-based filters, sensitised with **(A)** FDS and **(B)** Alizarin. In each case, spectra were recorded at ten arbitrary locations distributed approximately uniformly across the area of the filter, using a mixture of orientations parallel and perpendicular to the length of the filter. The spectra were almost spatially invariant in terms of shape and differed in magnitude by  $< \pm 5\%$ . The titania scaffolds were deposited manually by screen printing and improved spatial uniformity of the filter characteristics would be expected using more sophisticated deposition techniques.
